# Supplementary material
Source: HighWire-hosted journal article supplement (https://erj.ersjournals.com/content/55/4/1901700)
Supplement: inline-supplementary-material-2 [file inline-supplementary-material-2.pdf]

## Online Data Supplement

Figure S1

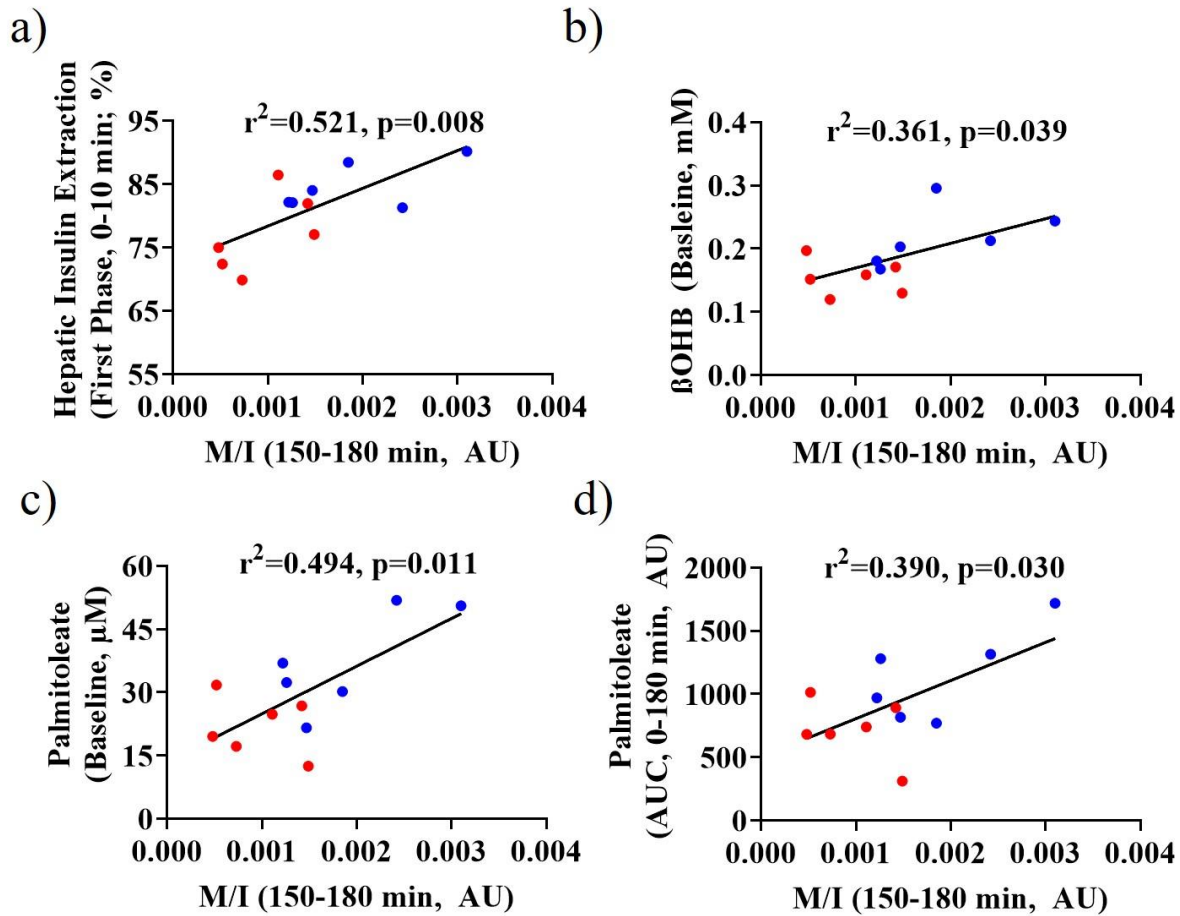

**Figure S1. Metabolic Correlates with Insulin Sensitivity**

a) M/I also correlated strongly with the hepatic insulin extraction during the 1<sup>st</sup> phase insulin secretion. b) and with  $\beta$ OHB at baseline. M/I correlated with palmitoleate at c) baseline and d) represented as AUC throughout the clamp.  $\beta$ OHB,  $\beta$ -hydroxybutyrate; M/I, mg glucose/kg body weight/min/ $\mu$ U insulin.ml.

Figure S2

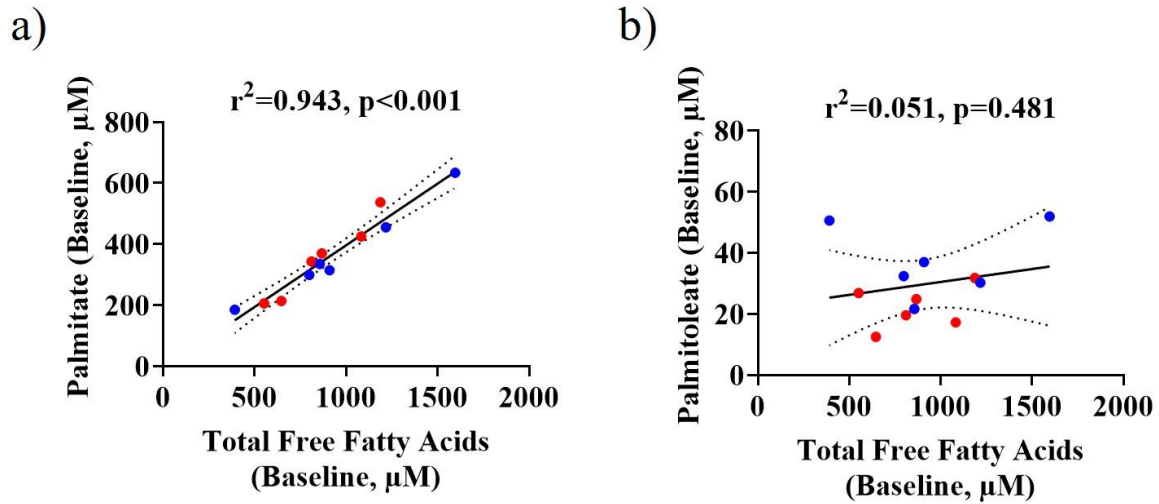

**Figure S2. Free Fatty Acid Species Relationships with Total Free Fatty Acids**

a) Baseline palmitoleate was strongly associated with ketone concentrations throughout the hyperglycemic clamp. b) Expectedly, complete fatty acid oxidation (acetylcarnitine) was associated with greater ketone concentrations throughout the hyperglycemic clamp.  $\beta\text{OHB}$ ,  $\beta$ -hydroxybutyrate. AUC, area under the curve calculated by the trapezoidal method; AU, arbitrary units.

Figure S3

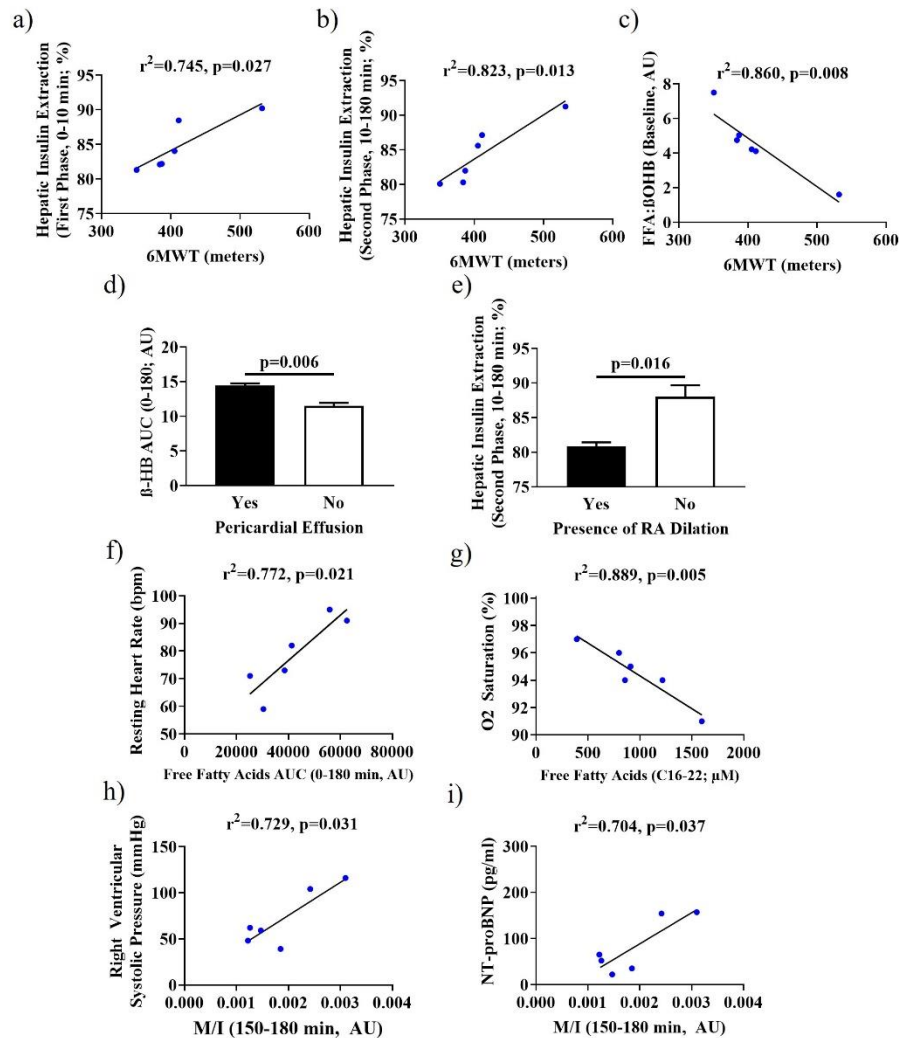

**Figure S3. Clinical Correlates with Nutrient Metabolism**

Greater distance walked during a 6MWT was related to greater a) 1<sup>st</sup> phase and b) 2<sup>nd</sup> phase hepatic insulin extraction along with c) a lower FFA:βOHB ratio. d) Presence of pericardial effusion was associated with greater βOHB during the hyperglycemic clamp. e) Presence of right arterial dilation was associated with lower hepatic insulin extraction. f) FFAs during the hyperglycemic clamp was related to higher resting heart rate. g) Fasting FFAs were related to lower O<sub>2</sub> saturation. h) M/I was increased with greater RVSP and i) greater NTpro-BNP. 6MWT, 6-minute walk test; FFA, free fatty acids; βOHB, β-hydroxybutyrate; RVSP, right ventricular systolic pressure; NT-proBNP, N-terminal pro b-type natriuretic peptide; M/I, mg glucose/kg body weight/min/μU insulin.ml.

Figure S4

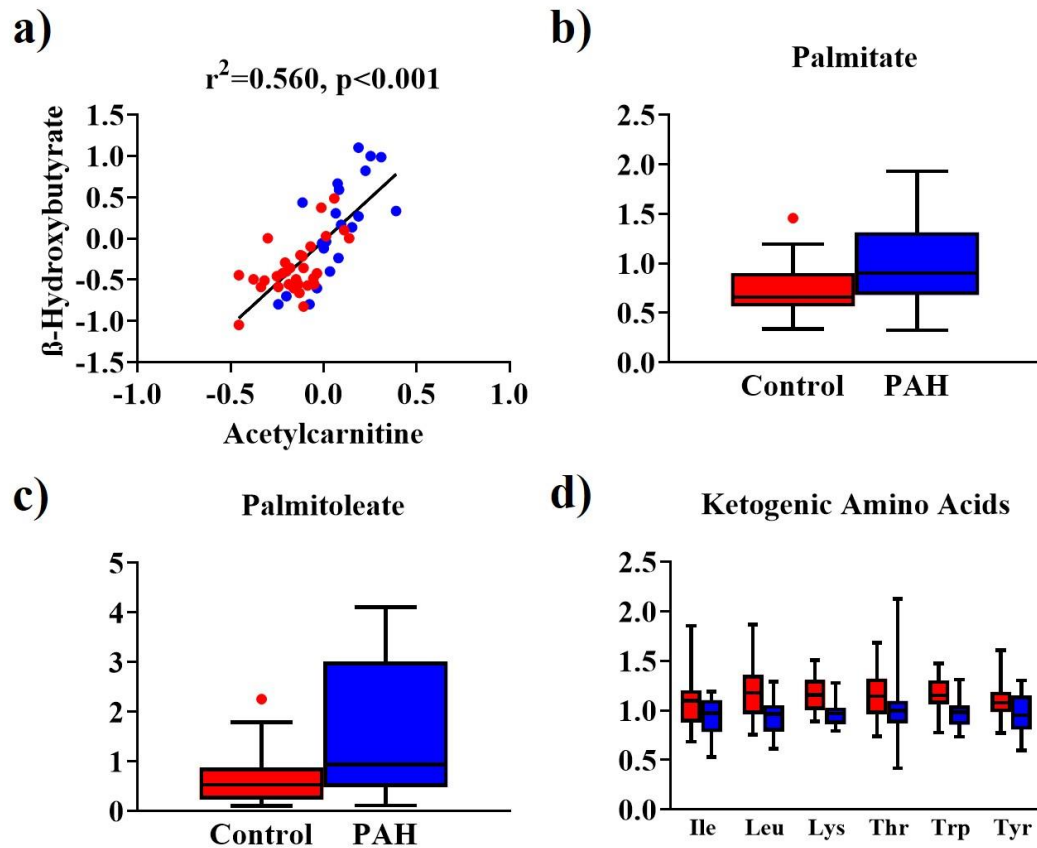

**Figure S4. Additional Metabolomic Data**

a)  $\beta$ OHB and acetylcarnitine are highly correlated. The fatty acids b) palmitate (1.4-fold,  $q=0.019$ ) and c) palmitoleate (2.2-fold,  $q=0.010$ ) were elevated in PAH. d) Ketogenic amino acids were significantly reduced in PAH. \*,  $q<0.01$ . PAH, pulmonary arterial hypertension;  $\beta$ OHB,  $\beta$ -hydroxybutyrate; Ile, isoleucine; Leu, leucine; Lys, lysine; Thr, threonine; Trp, tryptophan; Tyr, tyrosine.

Figure S5

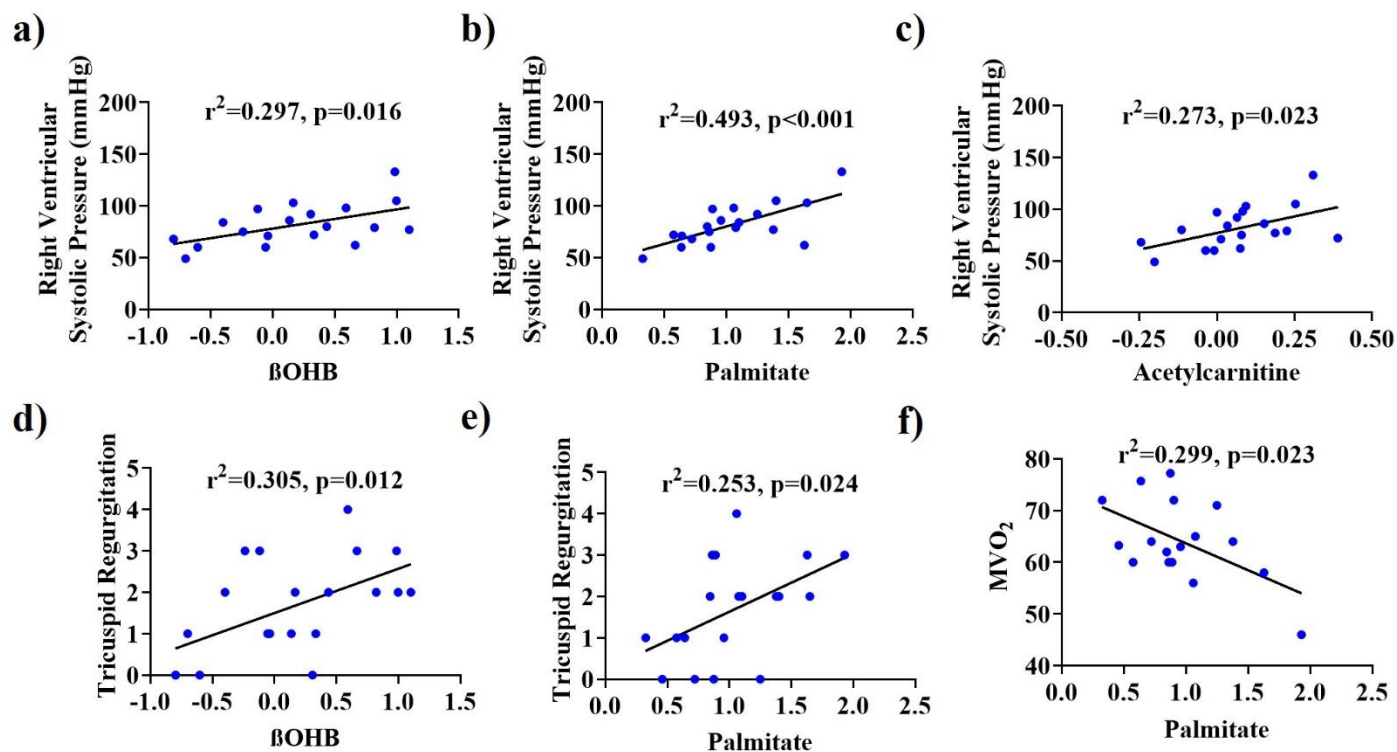

**Figure S5. Clinical Correlates with Select Plasma Metabolites**

RVSP was associated with higher a) BOHB, b) palmitate and c) acetylcarnitine. The grade of tricuspid regurgitation was associated with d) BOHB and e) palmitate. f) Palmitate was further associated with lower MVO<sub>2</sub>. RVSP, right ventricular systolic pressure; BOHB,  $\beta$ -hydroxybutyrate.

Figure S6

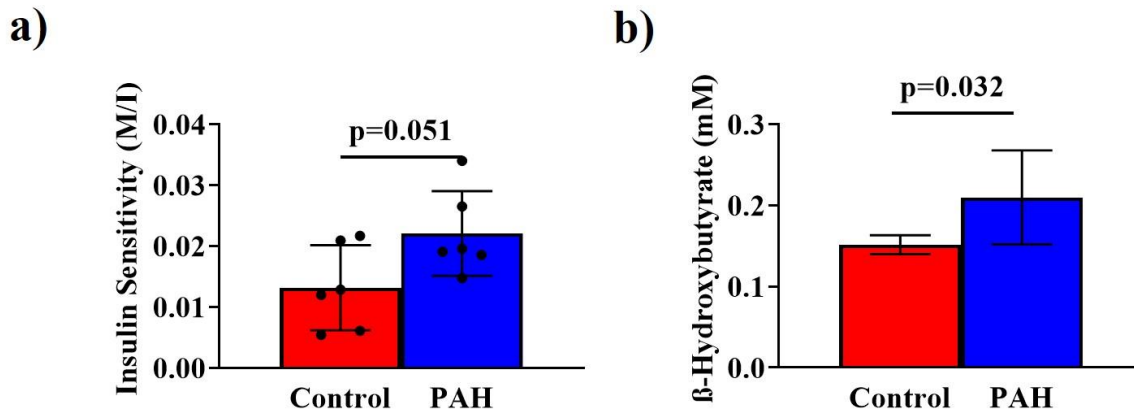

**Figure S6. Controlling Nutrient Metabolism Data for Basal Metabolic Rate**

Given the differences in BMR, we have thus performed an additional analysis to control for BMR, showing a) M/I remains elevated to a similar extent as our original data presented (original data: (M/I, 150-180 minute; PAH:  $0.02451 \pm 0.0070$ , Control:  $0.01323 \pm 0.0077$ ,  $p=0.024$ ) vs (M/I, 150-180 minutes normalized to BMR (kcal/min): Control:  $0.01316 \pm 0.0070$ , PAH:  $0.02209 \pm 0.0070$ ,  $p=0.051$ ). The differences in ketogenesis remain similar as well (original data:  $\beta$ OHb; Control:  $0.155 \text{mM} \pm 0.03$ , PAH:  $0.217 \pm 0.05$ ,  $p=0.018$ ) vs ( $\beta$ OHb: Control:  $0.151 \text{mM} \pm 0.01$ , PAH:  $0.210 \pm 0.06$ ,  $p=0.032$ ). M/I and ketogenesis were unchanged after normalizing to BMR. PAH, pulmonary arterial hypertension; BMR, basal metabolic rate;  $\beta$ OHb,  $\beta$ -hydroxybutyrate; M/I, mg glucose/kg body weight/min/ $\mu$ U insulin.ml.

**TABLE S1. Subject Characteristics (male participants removed)**

|                                                     | <b>Control</b> | <b>PAH</b>    | <b><i>p</i>-value</b> |
|-----------------------------------------------------|----------------|---------------|-----------------------|
| <b><i>N</i> (sex)</b>                               | 5 (5 F)        | 5 (5 F)       | -                     |
| <b>Age (years)</b>                                  | 35±11          | 52±9          | 0.03                  |
| <b>BMI (kg/m<sup>2</sup>)</b>                       | 30±4           | 32±5          | 0.52                  |
| <b>Baseline Glucose (mg/dl)</b>                     | 88±12          | 85±4          | 0.62                  |
| <b>Baseline Insulin (μU/ml)</b>                     | 16±8           | 12±3          | 0.28                  |
| <b>Baseline C-peptide (ng/ml)</b>                   | 2.2±0.6        | 2.1±0.6       | 0.76                  |
| <b>Baseline βOHB (mM)</b>                           | 0.15±0.02      | 0.22±0.05     | 0.02                  |
| <b>Baseline FFA (μM)</b>                            | 867±273        | 982±453       | 0.64                  |
| <b>HOMA-IR</b>                                      | 3.7±2.2        | 2.5±0.6       | 0.29                  |
| <b>BMR (kcal/day)</b>                               | 1367±153       | 1519±88       | 0.09                  |
| <b>O<sub>2</sub> Saturation (%)</b>                 | 99.2±1.3       | 94.6±2.3      | <0.01                 |
| <b>M/I (150-180 min)</b>                            | 0.0011±0.0004  | 0.0020±0.0008 | <0.05                 |
| <b>Hepatic Extraction, 2<sup>nd</sup> phase (%)</b> | 74.0±4.9       | 84.2±2.2      | 0.096                 |
| <b>Baseline Palmitoleate (μM)</b>                   | 22.6±7.7       | 40.4±10.2     | 0.014                 |
| <b>Baseline Acetylcarnitine (μM)</b>                | 7.8±1.4        | 10.2±1.8      | 0.045                 |

Data represent mean±SD.

PAH, subjects with pulmonary arterial hypertension; BMI, body mass index; βOHB, β-hydroxybutyrate; FFA, free fatty acids; HOMA-IR, homeostatic model assessment of insulin resistance; BMR, basal metabolic rate; O<sub>2</sub> Saturation; oxygen saturated hemoglobin relative to total hemoglobin; M/I, mg glucose/kg body weight/min/μU insulin.ml.
